# Supplementary material
Source: Springer Nature journal article supplement (https://www.springermedizin.de/resource/supplementary/12889_2014_6470_MOESM1_ESM.pdf/9498268)

## **BASELINE ASSESSMENT**

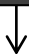

Randomly  
selected sample

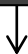

Volunteer  
sample

## **INTERVENTION**

## **FOLLOW UP ASSESSMENT**

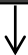

Same randomly  
selected sample  
from baseline

+

New randomly  
selected sample

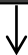

Same volunteer  
sample from  
baseline

+

New volunteer  
sample

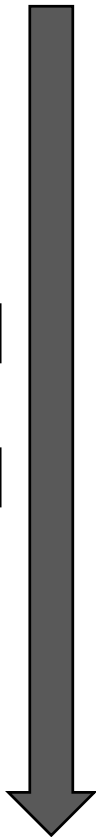

Supplement: MOESM1 [file 9498268]
